# Supplementary material
Source: Springer Nature journal article supplement (https://www.springermedizin.de/resource/supplementary/12967_2009_346_MOESM1_ESM.pdf/9576268)
Supplement: MOESM1 [file 9576268]

**A****IL-17****B****IL-4****IL-5****IL-6****IL-10****IL-13****TNF- $\alpha$** **IFN- $\gamma$** **MCP-1****RANTES**
